# Supplementary material
Source: publisher figshare collection journal article supplement (https://acs.figshare.com/ndownloader/files/9754921)
Supplement: Supplementary file 1 [file 9754921]

## Supporting Information

### Self-assembling peptide nanofiber hydrogels for controlled ocular delivery of timolol maleate

*Christina Karavasili<sup>#</sup>, Anastasia Komnenou<sup>±</sup>, Orestis L. Katsamenis<sup>‡</sup>, Glykeria Charalampidou<sup>±</sup>, Evangelia Kofidou<sup>±</sup>, Dimitrios Andreadis<sup>¶</sup>, Sotirios Koutsopoulos<sup>§</sup>,  
<sup>‡,\*</sup> Dimitrios G. Fatouros<sup>#,‡,\*</sup>*

<sup>#</sup>School of Pharmacy, Aristotle University of Thessaloniki, Department of Pharmaceutical Technology, GR-54124 Thessaloniki, Greece

<sup>±</sup>Ophthalmology Unit, Companion Animal Medicine, School of Veterinary Medicine, Faculty of Health Sciences, Aristotle University of Thessaloniki, Thessaloniki, Greece.

<sup>‡</sup>µ-VIS X-ray Imaging Centre, Faculty of Engineering and the Environment, University of Southampton, Southampton, SO17 1BJ, UK

<sup>¶</sup>Department of Oral Medicine/Pathology, School of Dentistry, Aristotle University of Thessaloniki, GR-54124 Thessaloniki, Greece

<sup>§</sup>Center for Biomedical Engineering, Massachusetts Institute of Technology, 77 Massachusetts Avenue, Cambridge, MA 02139, USA

<sup>‡,\*</sup>These authors contributed equally.

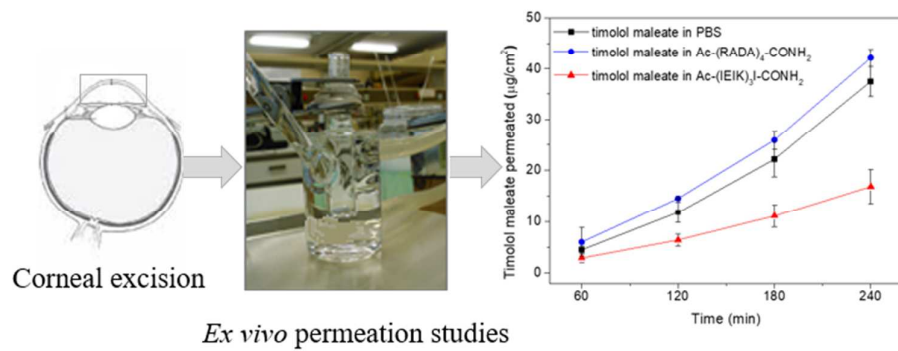

**Supplementary figure S1** : Schematic representation of the *ex vivo* experiment.
